# Supplementary material for: Are Ni–SiC nanoparticle electroplated coatings a safer alternative to hard chromium? A comprehensive aging, toxicity, and in silico study to assess safety by design
Source: Royal Society of Chemistry journal article supplement (doi:10.1039/d4en00751d), 2024-11-12
Supplement: d4en00751d1.pdf [file d4en00751d1.pdf]

## Are Ni-SiC Nanoparticle Electroplated Coatings a Safer Alternative to Hard Chromium? A Comprehensive Aging, Toxicity, and *In Silico* Studies to Assess Safety by Design

Swaroop Chakraborty<sup>a\*</sup>, Nathan Langford<sup>a</sup>, Yvonne Kohl<sup>b</sup>, Dimitra-Danai Varsou,<sup>c</sup> William Stokes<sup>d</sup>, Evangelos Papaioannou<sup>e</sup>, Sascha Wien<sup>b</sup>, Kata Berkesi<sup>e</sup>, Andrew Britton<sup>d</sup>, Bashiru Ibrahim<sup>a</sup>, Antreas Afantitis<sup>f</sup>, Alexandros Zoikis Karathanasis<sup>e</sup>, Andrew Nelson<sup>d</sup>, Eugenia Valsami-Jones<sup>a\*</sup>

<sup>a</sup>School of Geography, Earth and Environmental Sciences, University of Birmingham, B15 2TT Birmingham, UK

<sup>b</sup>Fraunhofer Institute for Biomedical Engineering IBMT, Joseph-von-Fraunhofer-Weg 1, Sulzbach 66280, Germany

<sup>c</sup>NovaMechanics MIKE, Piraeus 18545, Greece

<sup>d</sup>School of Chemistry, University of Leeds, Leeds LS2 9JT, U.K.

<sup>e</sup>Creative Nano, Metamorfoosi, Athens, Greece, 14451

<sup>f</sup>NovaMechanics Ltd, Nicosia 1070, Cyprus

\*email- [s.chakraborty@bham.ac.uk](mailto:s.chakraborty@bham.ac.uk); [e.valsamijones@bham.ac.uk](mailto:e.valsamijones@bham.ac.uk)

### Supplementary Information:

**Table S1- Composition of aging media used in the studies**

| Simulated Media                           | Chemical Composition                                                                                                                                                                                                               | References |
|-------------------------------------------|------------------------------------------------------------------------------------------------------------------------------------------------------------------------------------------------------------------------------------|------------|
| Artificial Sea Water (ASW) (pH- 7.5) (1L) | NaCl (24.60 g); NaHCO <sub>3</sub> (0.180 g); KCl (0.670 g); CaCl <sub>2</sub> (1.360 g); MgSO <sub>4</sub> .7H <sub>2</sub> O (6.290 g)                                                                                           | 12         |
| Waste Water (WW) (pH- 7.1) (1L)           | Milk powder (150 mg); Starch (80 mg); Na-acetate (103 mg); Yeast (24 mg); NH <sub>4</sub> Cl (21.7 mg); Urea (12.8 mg); KH <sub>2</sub> PO <sub>4</sub> (13.2 mg); NaHCO <sub>3</sub> (600 mg)                                     | 13         |
| 1mM NaNO <sub>3</sub> (pH 6.5- 7) (1L)    | NaNO <sub>3</sub> (0.085 g)                                                                                                                                                                                                        | 12         |
| Synthetic Sweat (SS) (1L)                 | H <sub>2</sub> O (18.01 g/mol), NaOH (39.99 g/mol), NaCl (58.44 g/mol), NH <sub>4</sub> Cl (53.49 g/mol), CH <sub>3</sub> CHOHCOOH (0.07 g/mol), NH <sub>2</sub> CONH <sub>2</sub> (0.05 g/mol), H <sub>3</sub> COOH (60.05 g/mol) | 14         |

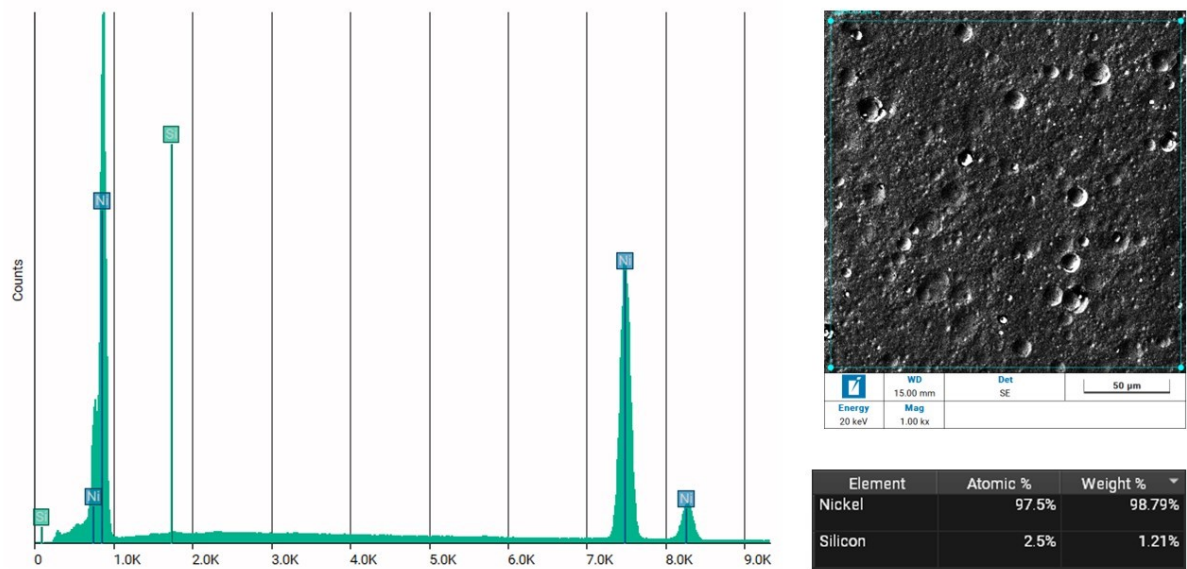

**Figure S1.** EDS analysis of Ni-SiC nanocomposite coatings.

**Table S2:** Release of Ni and SiC from Ni watt type and Ni-SiC nanocomposite electroplated coatings on exposure to cell culture media (n=3)

| Sample          | Ni (µg/mL)   |            | Si (µg/mL) |               |
|-----------------|--------------|------------|------------|---------------|
|                 | Ni watt type | 24 h       | 29.98±1.25 | No Si release |
|                 | 48 h         | 40.41±6.8  |            |               |
|                 | 72 h         | 60.91±4.6  |            |               |
| Ni watt/SiC NPs | 24 h         | 61.4±2.5   | 24 h       | 101.2±5.1     |
|                 | 48 h         | 87.6±5.1   | 48 h       | 230.9±6.9     |
|                 | 72 h         | 143.1±15.1 | 72 h       | 320.96±4.2    |

## Modelling Section-

### Golbraikh and Tropsha criteria

According to Golbraikh and Tropsha<sup>1-3</sup> a regression model is considered predictive if all of the conditions presented in Table S2 are satisfied.

$$r^2 = \left( \frac{\sum_{i=1}^N (y_i - \bar{y})(\hat{y}_i - \bar{\hat{y}})}{\sqrt{\sum_{i=1}^N (y_i - \bar{y})^2 \sum_{i=1}^N (\hat{y}_i - \bar{\hat{y}})^2}} \right)^2 \quad [\text{Eq. S11}]$$

$$R_0^2 = 1 - \frac{\sum_{i=1}^N (\hat{y}_i - \hat{y}_i^{r_0})^2}{\sum_{i=1}^N (\hat{y}_i - \bar{\hat{y}})^2}, \text{ where } \hat{y}_i^{r_0} = k'y$$

[Eq. SI2]

$$R_0'^2 = 1 - \frac{\sum_{i=1}^N (y_i - y_i^{r_0})^2}{\sum_{i=1}^N (y_i - \bar{y})^2}, \text{ where } y_i^{r_0} = k\hat{y}$$

[Eq.SI3]

$$k = \frac{\sum_{i=1}^N y_i \hat{y}_i}{\sum_{i=1}^N \hat{y}_i^2}$$

[Eq. SI4]

$$k' = \frac{\sum_{i=1}^N y_i \hat{y}_i}{\sum_{i=1}^N y_i^2}$$

[Eq. SI5]

Where  $N$ , is the number of samples,  $y_i$  and  $\hat{y}_i$ , are the actual and predicted endpoint values of the  $i^{th}$  sample respectively, and  $\bar{y}$  and  $\bar{\hat{y}}$ , are the average endpoint values of the experimental and predicted values respectively.

**Table S3:** Model acceptability criteria as defined by Golbraikh and Tropsha<sup>1-3</sup>.

| Statistic                                               | Rule           |
|---------------------------------------------------------|----------------|
| $r^2$                                                   | > 0.6          |
| $Q_{ext}^2$                                             | > 0.5          |
| $\frac{r^2 - R_0^2}{r^2}$ or $\frac{r^2 - R_0'^2}{r^2}$ | < 0.1          |
| $k$ or $k'$                                             | ∈ [0.85, 1.15] |
| $ R_0^2 - R_0'^2 $                                      | < 0.3          |

## References

1. Golbraikh, A. & Tropsha, A. Beware of  $q^2$ ! *J. Mol. Graph. Model.* **20**, 269–276 (2002).
2. Tropsha, A., Gramatica, P. & Gombar, V. K. The Importance of Being Earnest: Validation is the Absolute Essential for Successful Application and Interpretation of QSPR Models. *QSAR Comb. Sci.* **22**, 69–77 (2003).
3. Melagraki, G. & Afantitis, A. Enalos KNIME nodes: Exploring corrosion inhibition of steel in acidic medium. *Chemom. Intell. Lab. Syst.* **123**, 9–14 (2013).

Release data used for modelling

| Sample ID | Sample | F  | DC | I dens | Area | I real | M1      | M2      | dm     | Time | Theor m | Eff | Thickne | Pristine/Amorph | Number of grains | Coating        | Concent | Concent | Concent | Concent | Concent | Ionic Ni (mmol) | TEM      | Surface Charge | Morphol                               | Exposin Media | Zeta Potentia | Time of Exposur | Temper        | Chemic | Ni ion |
|-----------|--------|----|----|--------|------|--------|---------|---------|--------|------|---------|-----|---------|-----------------|------------------|----------------|---------|---------|---------|---------|---------|-----------------|----------|----------------|---------------------------------------|---------------|---------------|-----------------|---------------|--------|--------|
| MS1-CARVD | 1      | 10 | 50 | 1      | 70   | 0.7    | 17.4212 | 18.1545 | 0.7333 | 120  | 0.77    | 96  | 12.2    | Aged            | 3                | Ni/SiC coating | 10      | NA      | 300     | 35      | NA      | 110             | negative | Spherica       | 1mM Ni(NO <sub>3</sub> ) <sub>2</sub> | -10.80        | 7             | 37 °C           | Nirates of Ni | 4.08   |        |
| MS3-CARVD | 2      | 10 | 50 | 1      | 102  | 1.1    | 16.1352 | 16.6187 | 0.4835 | 120  | 1.2     | 40  | 5.5     | Aged            | 3                | Ni/SiC coating | 10      | NA      | 300     | 35      | NA      | 110             | negative | Spherica       | 1mM Ni(NO <sub>3</sub> ) <sub>2</sub> | -10.80        | 7             | 37 °C           | Nirates of Ni | 6.48   |        |
| MS4-CARVD | 3      | 10 | 50 | 2      | 102  | 2      | 16.4173 | 17.3072 | 0.8899 | 120  | 2.19    | 41  | 10.1    | Aged            | 3                | Ni/SiC coating | 10      | NA      | 300     | 35      | NA      | 110             | negative | Spherica       | 1mM Ni(NO <sub>3</sub> ) <sub>2</sub> | -10.80        | 7             | 37 °C           | Nirates of Ni | 4.8    |        |
| MS7-CARVD | 4      | 10 | 50 | 2      | 102  | 2      | 19.4487 | 23.572  | 4.1233 | 240  | 4.38    | 94  | 47      | Aged            | 3                | Ni/SiC coating | 10      | NA      | 300     | 35      | NA      | 110             | negative | Spherica       | 1mM Ni(NO <sub>3</sub> ) <sub>2</sub> | -10.80        | 7             | 37 °C           | Nirates of Ni | 3.65   |        |
| MS8-CARVD | 5      | 10 | 50 | 2      | 102  | 2      | 19.4828 | 23.524  | 4.0412 | 240  | 4.38    | 92  | 46.1    | Aged            | 3                | Ni/SiC coating | 10      | NA      | 300     | 35      | NA      | 110             | negative | Spherica       | 1mM Ni(NO <sub>3</sub> ) <sub>2</sub> | -10.80        | 7             | 37 °C           | Nirates of Ni | 3.99   |        |
| MS9-CARVD | 6      | 10 | 50 | 2      | 102  | 2.04   | 19.335  | 24.4728 | 5.1378 | 300  | 5.58    | 92  | 58.6    | Aged            | 3                | Ni/SiC coating | 10      | NA      | 300     | 35      | NA      | 110             | negative | Spherica       | 1mM Ni(NO <sub>3</sub> ) <sub>2</sub> | -10.80        | 7             | 37 °C           | Nirates of Ni | 3.44   |        |

|                 |    |    |    |   |     |      |         |         |        |     |      |    |      |      |   |                   |    |    |     |    |    |     |          |          |                           |     |            |   |          |                  |      |
|-----------------|----|----|----|---|-----|------|---------|---------|--------|-----|------|----|------|------|---|-------------------|----|----|-----|----|----|-----|----------|----------|---------------------------|-----|------------|---|----------|------------------|------|
| MS10-<br>CARVD  | 7  | 10 | 50 | 2 | 108 | 2.16 | 19.5306 | 25.0028 | 5.4722 | 300 | 5.91 | 93 | 58.9 | Aged | 3 | Ni/SiC<br>coating | 10 | NA | 300 | 35 | NA | 110 | negative | Spherica | 1mM<br>MnClO <sub>2</sub> | 7.1 | -<br>10.80 | 7 | 37<br>°C | Nirates<br>of Ni | 4.48 |
| MS_Old<br>2     | 8  | 10 | 50 | 2 | 70  | 1.4  | 15.0442 | 17.239  | 2.1948 | 120 | 2.37 | 93 | 23.6 | Aged | 3 | Ni/SiC<br>coating | 10 | NA | 300 | 35 | NA | 110 | negative | Spherica | 1mM<br>MnClO <sub>2</sub> | 7.1 | -<br>10.80 | 7 | 37<br>°C | Nirates<br>of Ni | 2.08 |
| MS_Old<br>40    | 9  | 10 | 50 | 2 | 70  | 1.4  | 15.0412 | 17.236  | 2.1948 | 120 | 2.37 | 93 | 23.6 | Aged | 3 | Ni/SiC<br>coating | 10 | NA | 300 | 35 | NA | 110 | negative | Spherica | 1mM<br>MnClO <sub>2</sub> | 7.1 | -<br>10.80 | 7 | 37<br>°C | Nirates<br>of Ni | 9.15 |
| MS_MS<br>44     | 10 | 10 | 50 | 2 | 108 | 2.16 | 19.3387 | 24.8853 | 5.5466 | 300 | 5.91 | 93 | 58.9 | Aged | 3 | Ni/SiC<br>coating | 10 | NA | 300 | 35 | NA | 110 | negative | Spherica | 1mM<br>MnClO <sub>2</sub> | 7.1 | -<br>10.80 | 7 | 37<br>°C | Nirates<br>of Ni | 4.13 |
| MS12-<br>CARVD  | 11 | 10 | 50 | 2 | 108 | 2.16 | 19.2772 | 24.791  | 5.5138 | 300 | 5.91 | 94 | 59.7 | Aged | 3 | Ni/SiC<br>coating | 10 | NA | 300 | 35 | NA | 110 | negative | Spherica | 1mM<br>MnClO <sub>2</sub> | 7.1 | -<br>10.80 | 7 | 37<br>°C | Nirates<br>of Ni | 7.56 |
| MS 15-<br>CARVD | 12 | 10 | 50 | 2 | 108 | 2.16 | 19.1637 | 24.7323 | 5.5686 | 300 | 5.91 | 93 | 59.4 | Aged | 3 | Ni/SiC<br>coating | 10 | NA | 300 | 35 | NA | 110 | negative | Spherica | 1mM<br>MnClO <sub>2</sub> | 7.1 | -<br>10.80 | 7 | 37<br>°C | Nirates<br>of Ni | 7.06 |
| MS_Old<br>2     | 13 | 10 | 50 | 2 | 70  | 1.4  | 15.0472 | 17.242  | 2.1948 | 120 | 2.37 | 93 | 23.6 | Aged | 3 | Ni/SiC<br>coating | 10 | NA | 300 | 35 | NA | 110 | negative | Spherica | 1mM<br>MnClO <sub>2</sub> | 7.1 | -<br>10.80 | 7 | 37<br>°C | Nirates<br>of Ni | 6.52 |

|           |    |    |    |   |     |     |         |         |        |     |      |    |      |      |   |                     |    |    |     |    |    |     |          |          |                                       |     |       |   |       |               |             |
|-----------|----|----|----|---|-----|-----|---------|---------|--------|-----|------|----|------|------|---|---------------------|----|----|-----|----|----|-----|----------|----------|---------------------------------------|-----|-------|---|-------|---------------|-------------|
| SABY      | 20 | 10 | 50 | 2 | 100 | 2   | 98.35   | 103.44  | 5.09   | 300 | 5.47 | 93 | 59.2 | Aged | 3 | Ni/SiC coating      | 10 | NA | 300 | 35 | NA | 110 | negative | Spherica | 1mM Ni(NO <sub>3</sub> ) <sub>2</sub> | 7.1 | 10.80 | 7 | 37 °C | Nitrate of Ni | 5.83782     |
| Ni5       | 18 | 10 | 50 | 2 | 70  | 1.4 | 34.639  | 37.99   | 3.351  | 290 | 3.45 | 97 | 55.7 | Aged | 3 | Ni coating on Brass | 0  | NA | 300 | 35 | NA | 0   | NA       | NA       | 1mM Ni(NO <sub>3</sub> ) <sub>2</sub> | 7.1 | 10.80 | 7 | 37 °C | Nitrate of Ni | 3.361200585 |
| Ni2       | 17 |    | ## | 2 | 70  | 1.4 | 35.364  | 39.162  | 3.798  | 150 | 3.83 | 99 | 63.1 | Aged | 3 | Ni coating          | 0  | NA | 300 | 35 | NA | 0   | NA       | NA       | 1mM Ni(NO <sub>3</sub> ) <sub>2</sub> | 7.1 | 10.80 | 7 | 37 °C | Nitrate of Ni | 6.780077    |
| MS_Old 16 | 16 | 10 | 50 | 2 | 70  | 1.4 | 15.0397 | 17.2345 | 2.1948 | 120 | 2.37 | 93 | 23.6 | Aged | 3 | Ni/SiC coating      | 10 | NA | 300 | 35 | NA | 110 | negative | Spherica | 1mM Ni(NO <sub>3</sub> ) <sub>2</sub> | 7.1 | 10.80 | 7 | 37 °C | Nirates of Ni | 6           |
| MS_Old 15 | 15 | 10 | 50 | 2 | 70  | 1.4 | 15.0412 | 17.236  | 2.1948 | 120 | 2.37 | 93 | 23.6 | Aged | 3 | Ni/SiC coating      | 10 | NA | 300 | 35 | NA | 110 | negative | Spherica | 1mM Ni(NO <sub>3</sub> ) <sub>2</sub> | 7.1 | 10.80 | 7 | 37 °C | Nirates of Ni | 4.94        |
| MS_Old 7  | 14 | 10 | 50 | 2 | 70  | 1.4 | 15.0412 | 17.236  | 2.1948 | 120 | 2.37 | 93 | 23.6 | Aged | 3 | Ni/SiC coating      | 10 | NA | 300 | 35 | NA | 110 | negative | Spherica | 1mM Ni(NO <sub>3</sub> ) <sub>2</sub> | 7.1 | 10.80 | 7 | 37 °C | Nirates of Ni | 3           |

|                |   |    |    |   |         |          |                     |                     |                |         |          |    |          |      |   |                   |    |        |         |    |        |         |          |          |          |         |          |   |          |                             |                      |
|----------------|---|----|----|---|---------|----------|---------------------|---------------------|----------------|---------|----------|----|----------|------|---|-------------------|----|--------|---------|----|--------|---------|----------|----------|----------|---------|----------|---|----------|-----------------------------|----------------------|
| MS10-<br>CARVD | 7 | 10 | 50 | 2 | 10<br>8 | 2.<br>16 | 19<br>.5<br>30<br>6 | 25<br>.0<br>02<br>8 | 5.<br>47<br>22 | 30<br>0 | 5.<br>91 | 93 | 58<br>.9 | Aged | 3 | Ni/SiC<br>coating | 10 | N<br>A | 30<br>0 | 35 | N<br>A | 11<br>0 | negative | Spherica | Simulate | 5.<br>5 | 9.<br>60 | 7 | 37<br>°C | Cl, OH,<br>NiO <sub>2</sub> | 50<br>0.<br>21<br>7  |
| MS9-<br>CARVD  | 6 | 10 | 50 | 2 | 10<br>2 | 2.<br>04 | 19<br>.3<br>35      | 24<br>.4<br>72<br>8 | 5.<br>13<br>78 | 30<br>0 | 5.<br>58 | 92 | 58<br>.6 | Aged | 3 | Ni/SiC<br>coating | 10 | N<br>A | 30<br>0 | 35 | N<br>A | 11<br>0 | negative | Spherica | Simulate | 5.<br>5 | 9.<br>60 | 7 | 37<br>°C | Cl, OH,<br>NiO <sub>2</sub> | 59<br>3.<br>10<br>23 |
| MS8-<br>CARVD  | 5 | 10 | 50 | 2 | 10<br>2 | 2        | 19<br>.4<br>82<br>8 | 23<br>.5<br>24      | 4.<br>04<br>12 | 24<br>0 | 4.<br>38 | 92 | 46<br>.1 | Aged | 3 | Ni/SiC<br>coating | 10 | N<br>A | 30<br>0 | 35 | N<br>A | 11<br>0 | negative | Spherica | Simulate | 5.<br>5 | 9.<br>60 | 7 | 37<br>°C | Cl, OH,<br>NiO <sub>2</sub> | 54<br>3.<br>97<br>81 |
| MS7-<br>CARVD  | 4 | 10 | 50 | 2 | 10<br>2 | 2        | 19<br>.4<br>48<br>7 | 23<br>.5<br>72      | 4.<br>12<br>33 | 24<br>0 | 4.<br>38 | 94 | 47       | Aged | 3 | Ni/SiC<br>coating | 10 | N<br>A | 30<br>0 | 35 | N<br>A | 11<br>0 | negative | Spherica | Simulate | 5.<br>5 | 9.<br>60 | 7 | 37<br>°C | Cl, OH,<br>NiO <sub>2</sub> | 64<br>9.<br>09<br>73 |
| MS4-<br>CARVD  | 3 | 10 | 50 | 2 | 10<br>2 | 2        | 16<br>.4<br>17<br>3 | 17<br>.3<br>07<br>2 | 0.<br>88<br>99 | 12<br>0 | 2.<br>19 | 41 | 10<br>.1 | Aged | 3 | Ni/SiC<br>coating | 10 | N<br>A | 30<br>0 | 35 | N<br>A | 11<br>0 | negative | Spherica | Simulate | 5.<br>5 | 9.<br>60 | 7 | 37<br>°C | Cl, OH,<br>NiO <sub>2</sub> | 85<br>1.<br>77<br>89 |
| MS3-<br>CARVD  | 2 | 10 | 50 | 1 | 10<br>2 | 1.<br>1  | 16<br>.1<br>35<br>2 | 16<br>.6<br>18<br>7 | 0.<br>48<br>35 | 12<br>0 | 1.<br>2  | 40 | 5.<br>5  | Aged | 3 | Ni/SiC<br>coating | 10 | N<br>A | 30<br>0 | 35 | N<br>A | 11<br>0 | negative | Spherica | Simulate | 5.<br>5 | 9.<br>60 | 7 | 37<br>°C | Cl, OH,<br>NiO <sub>2</sub> | 71<br>6.<br>45<br>66 |
| MS1-<br>CARVD  | 1 | 10 | 50 | 1 | 70      | 0.<br>7  | 17<br>.4<br>21<br>2 | 18<br>.1<br>54<br>5 | 0.<br>73<br>33 | 12<br>0 | 0.<br>77 | 96 | 12<br>.2 | Aged | 3 | Ni/SiC<br>coating | 10 | N<br>A | 30<br>0 | 35 | N<br>A | 11<br>0 | negative | Spherica | Simulate | 5.<br>5 | 9.<br>60 | 7 | 37<br>°C | Cl, OH,<br>NiO <sub>2</sub> | 78<br>1.<br>58<br>72 |



|                    |    |    |    |   |     |      |              |              |            |     |      |    |      |      |   |                   |    |    |     |    |    |     |          |          |               |           |   |          |                            |                      |
|--------------------|----|----|----|---|-----|------|--------------|--------------|------------|-----|------|----|------|------|---|-------------------|----|----|-----|----|----|-----|----------|----------|---------------|-----------|---|----------|----------------------------|----------------------|
| Old 7-<br>conventi | 14 | 10 | 50 | 2 | 70  | 1.4  | 15.0<br>41.2 | 17.2<br>36   | 2.19<br>48 | 120 | 2.37 | 93 | 23.6 | Aged | 3 | Ni/SiC<br>coating | 10 | NA | 300 | 35 | NA | 110 | negative | Spherica | Simulate<br>d | 5.5<br>60 | 7 | 37<br>°C | Cl, OH,<br>NO <sub>2</sub> | 61<br>3.65<br>9      |
| Old 3-<br>conventi | 13 | 10 | 50 | 2 | 70  | 1.4  | 15.0<br>47.2 | 17.2<br>42   | 2.19<br>48 | 120 | 2.37 | 93 | 23.6 | Aged | 3 | Ni/SiC<br>coating | 10 | NA | 300 | 35 | NA | 110 | negative | Spherica | Simulate<br>d | 5.5<br>60 | 7 | 37<br>°C | Cl, OH,<br>NO <sub>2</sub> | 7.<br>82<br>71<br>18 |
| MS 15-<br>GARVR    | 12 | 10 | 50 | 2 | 108 | 2.16 | 19.1<br>63.7 | 24.7<br>32.3 | 5.56<br>86 | 300 | 5.91 | 93 | 59.4 | Aged | 3 | Ni/SiC<br>coating | 10 | NA | 300 | 35 | NA | 110 | negative | Spherica | Simulate<br>d | 5.5<br>60 | 7 | 37<br>°C | Cl, OH,<br>NO <sub>2</sub> | 75<br>0.60<br>8      |
| MS12-<br>GARVR     | 11 | 10 | 50 | 2 | 108 | 2.16 | 19.2<br>77.2 | 24.7<br>91   | 5.51<br>38 | 300 | 5.91 | 94 | 59.7 | Aged | 3 | Ni/SiC<br>coating | 10 | NA | 300 | 35 | NA | 110 | negative | Spherica | Simulate<br>d | 5.5<br>60 | 7 | 37<br>°C | Cl, OH,<br>NO <sub>2</sub> | 6.<br>68<br>59<br>4  |
| MS11-<br>GARVR     | 10 | 10 | 50 | 2 | 108 | 2.16 | 19.3<br>38.7 | 24.8<br>85.3 | 5.54<br>66 | 300 | 5.91 | 93 | 58.9 | Aged | 3 | Ni/SiC<br>coating | 10 | NA | 300 | 35 | NA | 110 | negative | Spherica | Simulate<br>d | 5.5<br>60 | 7 | 37<br>°C | Cl, OH,<br>NO <sub>2</sub> | 52<br>4.08<br>69     |
| MS_Old<br>4A       | 9  | 10 | 50 | 2 | 70  | 1.4  | 15.0<br>41.2 | 17.2<br>36   | 2.19<br>48 | 120 | 2.37 | 93 | 23.6 | Aged | 3 | Ni/SiC<br>coating | 10 | NA | 300 | 35 | NA | 110 | negative | Spherica | Simulate<br>d | 5.5<br>60 | 7 | 37<br>°C | Cl, OH,<br>NO <sub>2</sub> | 62<br>1.12<br>08     |
| MS_Old<br>9        | 8  | 10 | 50 | 2 | 70  | 1.4  | 15.0<br>44.2 | 17.2<br>39   | 2.19<br>48 | 120 | 2.37 | 93 | 23.6 | Aged | 3 | Ni/SiC<br>coating | 10 | NA | 300 | 35 | NA | 110 | negative | Spherica | Simulate<br>d | 5.5<br>60 | 7 | 37<br>°C | Cl, OH,<br>NO <sub>2</sub> | 65<br>2.12<br>81     |

|              |    |    |    |   |     |     |      |        |      |      |      |    |      |      |   |                     |    |    |     |    |    |     |          |          |           |     |   |      |   |       |                                                                |       |    |    |
|--------------|----|----|----|---|-----|-----|------|--------|------|------|------|----|------|------|---|---------------------|----|----|-----|----|----|-----|----------|----------|-----------|-----|---|------|---|-------|----------------------------------------------------------------|-------|----|----|
| MS1-CARVD    | 1  | 10 | 50 | 1 | 70  | 0.7 | 17.4 | 18.1   | 0.73 | 12.0 | 0.77 | 96 | 12.2 | Aged | 3 | Ni/SiC coating      | 10 | NA | 300 | 35 | NA | 110 | negative | Spherica | DMEM      | 7.2 | - | 22.0 | 3 | 37 °C | More N after                                                   | 37.3  | 23 | 28 |
| SAB (Si/NiC) | 20 | 10 | 50 | 2 | 100 | 2   | 98.3 | 103.44 | 5.09 | 300  | 5.47 | 93 | 59.2 | Aged | 3 | Ni/SiC coating      | 10 | NA | 300 | 35 | NA | 110 | negative | Spherica | Simulate  | 5.5 | - | -    | 7 | 37 °C | More N after                                                   | 12.45 | 19 | 74 |
| Ni6          | 19 | 10 | 50 | 2 | 70  | 1.4 | 35.1 | 38.85  | 3.75 | 300  | 3.83 | 98 | 62.3 | Aged | 3 | Ni coating          | 0  | NA | 300 | 35 | NA | 0   | NA       | NA       | Simulate  | 5.5 | - | -    | 7 | 37 °C | Cl, OH, NiO <sub>2</sub>                                       | 81.3  | 47 | 31 |
| Ni5          | 18 | 10 | 50 | 2 | 70  | 1.4 | 34.6 | 37.99  | 3.35 | 290  | 3.45 | 97 | 55.7 | Aged | 3 | Ni coating on Brass | 0  | NA | 300 | 35 | NA | 0   | NA       | NA       | Simulated | 5.5 | - | -    | 7 | 37 °C | Cl, OH, NiO <sub>2</sub> , CO <sub>2</sub> of NiO <sub>2</sub> | 72.9  | 35 | 49 |
| Ni2          | 17 |    | ## | 2 | 70  | 1.4 | 35.3 | 39.1   | 3.79 | 150  | 3.83 | 99 | 63.1 | Aged | 3 | Ni coating          | 0  | NA | 300 | 35 | NA | 0   | NA       | NA       | Simulate  | 5.5 | - | -    | 7 | 37 °C | Cl, OH, NiO <sub>2</sub>                                       | 10.26 | 5  | 41 |
| Old 9-       | 16 | 10 | 50 | 2 | 70  | 1.4 | 15.0 | 17.2   | 2.19 | 120  | 2.37 | 93 | 23.6 | Aged | 3 | Ni/SiC coating      | 10 | NA | 300 | 35 | NA | 110 | negative | Spherica | Simulate  | 5.5 | - | -    | 7 | 37 °C | Cl, OH, NiO <sub>2</sub>                                       | 59.1  | 21 | 69 |
| Old 8-       | 15 | 10 | 50 | 2 | 70  | 1.4 | 15.0 | 17.2   | 2.19 | 120  | 2.37 | 93 | 23.6 | Aged | 3 | Ni/SiC coating      | 10 | NA | 300 | 35 | NA | 110 | negative | Spherica | Simulate  | 5.5 | - | -    | 7 | 37 °C | Cl, OH, NiO <sub>2</sub>                                       | 51.9  | 87 | 72 |

|                |   |    |    |   |         |          |                     |                      |                |         |          |    |          |      |   |                   |    |        |         |    |        |         |          |          |      |         |                    |   |          |                 |                      |
|----------------|---|----|----|---|---------|----------|---------------------|----------------------|----------------|---------|----------|----|----------|------|---|-------------------|----|--------|---------|----|--------|---------|----------|----------|------|---------|--------------------|---|----------|-----------------|----------------------|
| MS3-<br>CARVD  | 2 | 10 | 50 | 1 | 10<br>2 | 1.<br>1  | 16<br>.1<br>35<br>2 | 16<br>.6<br>18<br>7  | 0.<br>48<br>35 | 12<br>0 | 1.<br>2  | 40 | 5.<br>5  | Aged | 3 | Ni/SiC<br>coating | 10 | N<br>A | 30<br>0 | 35 | N<br>A | 11<br>0 | negative | Spherica | DMEM | 7.<br>2 | -<br>22<br>.0<br>0 | 3 | 37<br>°C | More N<br>after | 33<br>6.<br>79<br>25 |
| MS4-<br>CARVD  | 3 | 10 | 50 | 2 | 10<br>2 | 2        | 16<br>.4<br>17<br>3 | 17<br>.3<br>07<br>2  | 0.<br>88<br>99 | 12<br>0 | 2.<br>19 | 41 | 10<br>.1 | Aged | 3 | Ni/SiC<br>coating | 10 | N<br>A | 30<br>0 | 35 | N<br>A | 11<br>0 | negative | Spherica | DMEM | 7.<br>2 | -<br>22<br>.0<br>0 | 3 | 37<br>°C | More N<br>after | 55<br>.0<br>04<br>38 |
| MS7-<br>CARVD  | 4 | 10 | 50 | 2 | 10<br>2 | 2        | 19<br>.4<br>48<br>7 | 23<br>.5<br>52<br>72 | 4.<br>12<br>33 | 24<br>0 | 4.<br>38 | 94 | 47       | Aged | 3 | Ni/SiC<br>coating | 10 | N<br>A | 30<br>0 | 35 | N<br>A | 11<br>0 | negative | Spherica | DMEM | 7.<br>2 | -<br>22<br>.0<br>0 | 3 | 37<br>°C | More N<br>after | 30<br>.1<br>64<br>81 |
| MS8-<br>CARVD  | 5 | 10 | 50 | 2 | 10<br>2 | 2        | 19<br>.4<br>82<br>8 | 23<br>.5<br>54<br>24 | 4.<br>04<br>12 | 24<br>0 | 4.<br>38 | 92 | 46<br>.1 | Aged | 3 | Ni/SiC<br>coating | 10 | N<br>A | 30<br>0 | 35 | N<br>A | 11<br>0 | negative | Spherica | DMEM | 7.<br>2 | -<br>22<br>.0<br>0 | 3 | 37<br>°C | More N<br>after | 22<br>9.<br>01<br>4  |
| MS9-<br>CARVD  | 6 | 10 | 50 | 2 | 10<br>2 | 2.<br>04 | 19<br>.3<br>35      | 24<br>.4<br>72<br>8  | 5.<br>13<br>78 | 30<br>0 | 5.<br>58 | 92 | 58<br>.6 | Aged | 3 | Ni/SiC<br>coating | 10 | N<br>A | 30<br>0 | 35 | N<br>A | 11<br>0 | negative | Spherica | DMEM | 7.<br>2 | -<br>22<br>.0<br>0 | 3 | 37<br>°C | More N<br>after | 24<br>9.<br>72<br>61 |
| MS10-<br>CARVD | 7 | 10 | 50 | 2 | 10<br>8 | 2.<br>16 | 19<br>.5<br>30<br>6 | 25<br>.0<br>02<br>8  | 5.<br>47<br>22 | 30<br>0 | 5.<br>91 | 93 | 58<br>.9 | Aged | 3 | Ni/SiC<br>coating | 10 | N<br>A | 30<br>0 | 35 | N<br>A | 11<br>0 | negative | Spherica | DMEM | 7.<br>2 | -<br>22<br>.0<br>0 | 3 | 37<br>°C | More N<br>after | 27<br>3.<br>94<br>98 |
| MS_Old         | 8 | 10 | 50 | 2 | 70      | 1.<br>4  | 15<br>.0<br>44<br>2 | 17<br>.2<br>39       | 2.<br>19<br>48 | 12<br>0 | 2.<br>37 | 93 | 23<br>.6 | Aged | 3 | Ni/SiC<br>coating | 10 | N<br>A | 30<br>0 | 35 | N<br>A | 11<br>0 | negative | Spherica | DMEM | 7.<br>2 | -<br>22<br>.0<br>0 | 3 | 37<br>°C | More N<br>after | 9.<br>48<br>82<br>58 |

|                    |    |    |    |   |     |      |              |               |               |      |      |    |      |      |   |                   |    |    |     |    |    |     |          |          |      |     |            |   |          |                 |                |
|--------------------|----|----|----|---|-----|------|--------------|---------------|---------------|------|------|----|------|------|---|-------------------|----|----|-----|----|----|-----|----------|----------|------|-----|------------|---|----------|-----------------|----------------|
| MS11-<br>GAPVD     | 9  | 10 | 50 | 2 | 70  | 1.4  | 15.0<br>41.2 | 17.2<br>36.36 | 2.19<br>48.2  | 12.0 | 2.37 | 93 | 23.6 | Aged | 3 | Ni/SiC<br>coating | 10 | NA | 300 | 35 | NA | 110 | negative | Spherica | DMEM | 7.2 | -<br>22.00 | 3 | 37<br>°C | More N<br>after | 22.0<br>68.78  |
| MS12-<br>GAPVD     | 10 | 10 | 50 | 2 | 108 | 2.16 | 19.3<br>38.7 | 24.8<br>85.3  | 5.54<br>66.6  | 300  | 5.91 | 93 | 58.9 | Aged | 3 | Ni/SiC<br>coating | 10 | NA | 300 | 35 | NA | 110 | negative | Spherica | DMEM | 7.2 | -<br>22.00 | 3 | 37<br>°C | More N<br>after | 24.1.<br>20.28 |
| MS15-<br>GAPVD     | 11 | 10 | 50 | 2 | 108 | 2.16 | 19.2<br>77.2 | 24.7<br>91.91 | 5.51<br>38.38 | 300  | 5.91 | 94 | 59.7 | Aged | 3 | Ni/SiC<br>coating | 10 | NA | 300 | 35 | NA | 110 | negative | Spherica | DMEM | 7.2 | -<br>22.00 | 3 | 37<br>°C | More N<br>after | 26.7.<br>44.75 |
| Old 3-<br>conventi | 12 | 10 | 50 | 2 | 108 | 2.16 | 19.1<br>63.7 | 24.7<br>32.3  | 5.56<br>86.86 | 300  | 5.91 | 93 | 59.4 | Aged | 3 | Ni/SiC<br>coating | 10 | NA | 300 | 35 | NA | 110 | negative | Spherica | DMEM | 7.2 | -<br>22.00 | 3 | 37<br>°C | More N<br>after | 31.7.<br>30.15 |
| Old 7-<br>conventi | 13 | 10 | 50 | 2 | 70  | 1.4  | 15.0<br>47.2 | 17.2<br>42.42 | 2.19<br>48.2  | 12.0 | 2.37 | 93 | 23.6 | Aged | 3 | Ni/SiC<br>coating | 10 | NA | 300 | 35 | NA | 110 | negative | Spherica | DMEM | 7.2 | -<br>22.00 | 3 | 37<br>°C | More N<br>after | 32.1.<br>59.47 |
| Old 8-<br>conventi | 14 | 10 | 50 | 2 | 70  | 1.4  | 15.0<br>41.2 | 17.2<br>36.36 | 2.19<br>48.2  | 12.0 | 2.37 | 93 | 23.6 | Aged | 3 | Ni/SiC<br>coating | 10 | NA | 300 | 35 | NA | 110 | negative | Spherica | DMEM | 7.2 | -<br>22.00 | 3 | 37<br>°C | More N<br>after | 27.8<br>08.32  |
| Old 8-<br>conventi | 15 | 10 | 50 | 2 | 70  | 1.4  | 15.0<br>41.2 | 17.2<br>36.36 | 2.19<br>48.2  | 12.0 | 2.37 | 93 | 23.6 | Aged | 3 | Ni/SiC<br>coating | 10 | NA | 300 | 35 | NA | 110 | negative | Spherica | DMEM | 7.2 | -<br>22.00 | 3 | 37<br>°C | More N<br>after | 12.7<br>67.05  |

|                   |    |    |    |   |     |     |         |         |        |     |      |    |      |      |   |                       |    |    |     |    |    |     |          |           |      |     |        |   |       |                            |            |
|-------------------|----|----|----|---|-----|-----|---------|---------|--------|-----|------|----|------|------|---|-----------------------|----|----|-----|----|----|-----|----------|-----------|------|-----|--------|---|-------|----------------------------|------------|
| SABYDO<br>MA      | 20 | 10 | 50 | 2 | 100 | 2   | 98.35   | 103.44  | 5.09   | 300 | 5.47 | 93 | 59.2 | Aged | 3 | Ni/SiC<br>coating on  | 10 | NA | 300 | 35 | NA | 110 | negative | Spherical | DMEM | 7.2 | -22.00 | 3 | 37 °C | NiO,<br>NiAl               | 14.867     |
| SAB<br>(Si/NiC)   | 20 | 10 | 50 | 2 | 100 | 2   | 98.35   | 103.44  | 5.09   | 300 | 5.47 | 93 | 59.2 | Aged | 3 | Ni/SiC<br>coating on  | 10 | NA | 300 | 35 | NA | 110 | negative | Spherical | WW   |     | -7.15  | 7 | RT    | NiO,<br>NiAl               | 19.0366    |
| SABYD<br>CMA      | 20 | 10 | 50 | 2 | 100 | 2   | 98.35   | 103.44  | 5.09   | 300 | 5.47 | 93 | 59.2 | Aged | 3 | Ni/SiC<br>coating on  | 10 | NA | 300 | 35 | NA | 110 | negative | Spherical | ASW  |     | -19.30 | 7 | RT    | NiO,<br>NiAl               | 14.8997    |
| Ni6               | 19 | 10 | 50 | 2 | 70  | 1.4 | 35.1    | 38.85   | 3.75   | 300 | 3.83 | 98 | 62.3 | Aged | 3 | Ni<br>coating on      | 0  | NA | 300 | 35 | NA | 0   | NA       | NA        | DMEM | 7.2 |        | 3 | 37 °C | More N<br>after            | 34.1634    |
| Ni5               | 18 | 10 | 50 | 2 | 70  | 1.4 | 34.639  | 37.99   | 3.351  | 290 | 3.45 | 97 | 55.7 | Aged | 3 | Ni coating<br>on base | 0  | NA | 300 | 35 | NA | 0   | NA       | NA        | DMEM | 7.2 |        | 3 | 37 °C | More N after<br>before NiO | 26.0040151 |
| Ni2               | 17 |    | ## | 2 | 70  | 1.4 | 35.364  | 39.162  | 3.798  | 150 | 3.83 | 99 | 63.1 | Aged | 3 | Ni<br>coating on      | 0  | NA | 300 | 35 | NA | 0   | NA       | NA        | DMEM | 7.2 |        | 3 | 37 °C | More N<br>after            | 38.82328   |
| Old 9-<br>convent | 16 | 10 | 50 | 2 | 70  | 1.4 | 15.0397 | 17.2345 | 2.1948 | 120 | 2.37 | 93 | 23.6 | Aged | 3 | Ni/SiC<br>coating on  | 10 | NA | 300 | 35 | NA | 110 | negative | Spherical | DMEM | 7.2 | -22.00 | 3 | 37 °C | More N<br>after            | 27.30003   |
